# Supplementary material
Source: HighWire-hosted journal article supplement (https://bmjopen.bmj.com/content/9/1/e022845)
Supplement: inline-supplementary-material-1 [file inline-supplementary-material-1.pdf]

**Supplemental Online Table A Countries of Birth included in Refugee and Asylum Seekers (RAS)**

|                                   | 2011         | 2002-2011            | 2002-2012                |                                                          |              |         |         |
|-----------------------------------|--------------|----------------------|--------------------------|----------------------------------------------------------|--------------|---------|---------|
|                                   | ERP          | Arrivals<br>(Census) | Humanitarian<br>arrivals | Percent ERP recently<br>arrived on Humanitarian<br>visas | Criteria met | Include | Exclude |
| Afghanistan                       | 3287         | 2489                 | 2865                     | 87%                                                      | TRUE         | ✓       |         |
| Bhutan                            | 704          | 688                  | 841                      | 119%                                                     | TRUE         | ✓       |         |
| Burma (Myanmar)                   | 723          | 576                  | 724                      | 100%                                                     | TRUE         | ✓       |         |
| Burundi                           | 488          | 447                  | 492                      | 101%                                                     | TRUE         | ✓       |         |
| China (ex SARs & Taiwan Province) | 15932        | 13247                | 174                      | 1%                                                       | FALSE        |         | ✓       |
| Congo                             | 750          | 697                  | 839                      | 112%                                                     | TRUE         | ✓       |         |
| Egypt                             | 1232         | 394                  | 133                      | 11%                                                      | FALSE        |         | ✓       |
| Eritrea                           | 174          | 58                   | 129                      | 74%                                                      | TRUE         | ✓       |         |
| Ethiopia                          | 581          | 384                  | 410                      | 71%                                                      | TRUE         | ✓       |         |
| Ghana                             | 213          | 145                  | 82                       | 38%                                                      | TRUE         |         | ✓       |
| Guinea                            | 121          | 112                  | 130                      | 107%                                                     | TRUE         | ✓       |         |
| Iran                              | 2821         | 1523                 | 1027                     | 36%                                                      | TRUE         |         | ✓       |
| Iraq                              | 1319         | 797                  | 724                      | 55%                                                      | TRUE         | ✓       |         |
| Kenya                             | 1162         | 832                  | 439                      | 38%                                                      | TRUE         |         | ✓       |
| Liberia                           | 541          | 528                  | 650                      | 120%                                                     | TRUE         | ✓       |         |
| Malawi                            | 82           | 45                   | 39                       | 48%                                                      | TRUE         |         | ✓       |
| Nepal                             | 1037         | 949                  | 369                      | 36%                                                      | FALSE        |         | ✓       |
| Pakistan                          | 1358         | 1079                 | 263                      | 19%                                                      | FALSE        |         | ✓       |
| Rwanda                            | 86           | 82                   | 94                       | 109%                                                     | TRUE         | ✓       |         |
| Sierra Leone                      | 208          | 198                  | 212                      | 102%                                                     | TRUE         | ✓       |         |
| Somalia                           | 253          | 214                  | 231                      | 91%                                                      | TRUE         | ✓       |         |
| Sudan                             | 1805         | 1630                 | 1910                     | 106%                                                     | TRUE         | ✓       |         |
| Tanzania                          | 454          | 346                  | 358                      | 79%                                                      | TRUE         | ✓       |         |
| Togo                              | 55           | 53                   | 56                       | 102%                                                     | TRUE         | ✓       |         |
| Uganda                            | 234          | 173                  | 179                      | 76%                                                      | TRUE         | ✓       |         |
| Uzbekistan                        | 205          | 135                  | 84                       | 41%                                                      | TRUE         |         | ✓       |
| <b>Total</b>                      | <b>35825</b> | <b>27821</b>         | <b>13454</b>             | <b>38%</b>                                               |              |         |         |

Note:

European entrants excluded hence Former Yugoslav Republic of Macedonia (Ranked 20) was omitted.

Congo includes: Congo; Congo Republic and Democratic Republic of Congo.

**Supplemental Online Table B A summary of population by vulnerability group (Adelaide metropolitan area, ages 20 or more)**

|                 | Estimated Resident Population* |                |                | Change        |             |
|-----------------|--------------------------------|----------------|----------------|---------------|-------------|
|                 | Census<br>2006                 | Census<br>2011 | Mean           | Absolute      | Relative    |
| RASC            | 3,668                          | 7,482          | 5,575          | 3,814         | 104.0%      |
| Aboriginal      | 8,665                          | 10,141         | 9,403          | 1,476         | 17.0%       |
| Aged 75 or more | 89,284                         | 93,080         | 91,182         | 3,796         | 4.3%        |
| All others      | 781,936                        | 827,670        | 804,803        | 45,734        | 5.8%        |
| <b>Total</b>    | <b>883,553</b>                 | <b>938,373</b> | <b>910,963</b> | <b>54,820</b> | <b>6.2%</b> |

\*Based on SA Government Regions of: Eastern Adelaide, Northern Adelaide, Southern Adelaide, Western Adelaide and Adelaide Hills

**Supplemental Online Table C ICD-10 diagnosis codes used for identifying ED presentations for ambulatory care sensitive conditions (ACSC)**

| Category                 | Conditions                            | ICD-10-AM codes                                                                                                             |
|--------------------------|---------------------------------------|-----------------------------------------------------------------------------------------------------------------------------|
| Acute                    | Acute pneumonia                       | J153,J154,J157,J160                                                                                                         |
|                          | Cellulitis                            | L02,L03,L04,L08,L88,L980,L983                                                                                               |
|                          | Convulsions                           | G40,G41,R56                                                                                                                 |
|                          | Dental                                | K02,K03,K04,K05,K06,K08,K12,K13,K098,K099,K140                                                                              |
|                          | Eclampsia                             | O15                                                                                                                         |
|                          | Ears, nose throat infections          | H66,J02,J03,J06,J312                                                                                                        |
|                          | Gangrene                              | I7024,E0952,R02                                                                                                             |
|                          | Perforated/bleeding ulcer             | K250,K251,K252,K254,K255,K256,K260,K261,K262,K264,K265,K266,<br>K270,K271,K272,K274,K275,K276,K280,K281,K282,K284,K285,K286 |
|                          | Pelvic inflammatory disease           | N70,N73,N74                                                                                                                 |
| Urinary tract infections | N10-N12,N136,N151,N159,N289,N390,N399 |                                                                                                                             |
| Chronic                  | Asthma                                | J45, J46                                                                                                                    |
|                          | Bronchiactisis                        | J47                                                                                                                         |
|                          | Congestive cardiac failure            | I50, I11.0, J81                                                                                                             |
|                          | Diabetes complications                | E10–E14.9                                                                                                                   |
|                          | COPD                                  | J20, J41, J42, J43, J44, J47                                                                                                |
|                          | Angina                                | I20, I24.0, I24.8, I24.9                                                                                                    |
|                          | Iron deficiency anaemia               | D50.1, D50.8, D50.9                                                                                                         |
|                          | Hypertension                          | I10, I11.9                                                                                                                  |
|                          | Nutritional deficiencies              | E40, E41, E42, E43, E55.0, E64.3                                                                                            |
|                          | Rheumatic heart disease               | I00 to I09                                                                                                                  |
| Vaccine                  | Influenza                             | J10-J14                                                                                                                     |
|                          | Other vaccine                         | A35-A37,A80,B01,B05,B06,B169,B180,B181,B26,G000                                                                             |

**Supplemental Online Table D Persons with ACSC and GP-type presentations to South Australian metropolitan public hospital EDs, 2005-06 to 2010-11**

|                                          | Refugee & Asylum Seeker Countries |                             |                           | Aboriginal |                             |                           | Aged 75 or more |                             |                           | All others |                             |                           |
|------------------------------------------|-----------------------------------|-----------------------------|---------------------------|------------|-----------------------------|---------------------------|-----------------|-----------------------------|---------------------------|------------|-----------------------------|---------------------------|
|                                          | N                                 | % of individuals presenting | Rate per 1,000 population | N          | % of individuals presenting | Rate per 1,000 population | N               | % of individuals presenting | Rate per 1,000 population | N          | % of individuals presenting | Rate per 1,000 population |
| Persons presenting for ACSC              | 734                               | 19.6%                       | 131.7                     | 1,454      | 28.5%                       | 154.6                     | 18,823          | 27.8%                       | 206.4                     | 57,670     | 16.6%                       | 71.7                      |
| Persons presenting with acute ACSC       | 619                               | 16.5%                       | 111.0                     | 1,183      | 23.2%                       | 125.8                     | 9,739           | 14.4%                       | 106.8                     | 41,505     | 12.0%                       | 51.6                      |
| Cellulitis                               | 87                                | 2.3%                        | 15.6                      | 401        | 7.9%                        | 42.6                      | 2,836           | 4.2%                        | 31.1                      | 11,956     | 3.4%                        | 14.9                      |
| Dental conditions                        | 147                               | 3.9%                        | 26.4                      | 298        | 5.8%                        | 31.7                      | 268             | 0.4%                        | 2.9                       | 7,445      | 2.1%                        | 9.3                       |
| Urinary tract infections/ pyelonephritis | 181                               | 4.8%                        | 32.5                      | 284        | 5.6%                        | 30.2                      | 5,623           | 8.3%                        | 61.7                      | 10,994     | 3.2%                        | 13.7                      |
| All other acute ACSC                     | 27                                | 0.7%                        | 4.8                       | 161        | 3.2%                        | 17.1                      | 808             | 1.2%                        | 8.9                       | 4,280      | 1.2%                        | 5.3                       |
| Persons presenting with chronic ACSC     | 105                               | 2.8%                        | 18.8                      | 391        | 7.7%                        | 41.6                      | 10,916          | 16.1%                       | 119.7                     | 16,965     | 4.9%                        | 21.1                      |
| Angina                                   | 15                                | 0.4%                        | 2.7                       | 119        | 2.3%                        | 12.7                      | 2,984           | 4.4%                        | 32.7                      | 4,998      | 1.4%                        | 6.2                       |
| Asthma                                   | 36                                | 1.0%                        | 6.5                       | 126        | 2.5%                        | 13.4                      | 521             | 0.8%                        | 5.7                       | 5,585      | 1.6%                        | 6.9                       |
| Bronchiectasis                           | 3                                 | 0.1%                        | 0.5                       | 1          | 0.0%                        | 0.1                       | 70              | 0.1%                        | 0.8                       | 122        | 0.0%                        | 0.2                       |
| Congestive cardiac failure               | 7                                 | 0.2%                        | 1.3                       | 69         | 1.4%                        | 7.3                       | 5,002           | 7.4%                        | 54.9                      | 2,216      | 0.6%                        | 2.8                       |
| COPD                                     | 8                                 | 0.2%                        | 1.4                       | 74         | 1.5%                        | 7.9                       | 2,774           | 4.1%                        | 30.4                      | 2,909      | 0.8%                        | 3.6                       |
| Diabetes complications                   | 18                                | 0.5%                        | 3.2                       | 43         | 0.8%                        | 4.6                       | 210             | 0.3%                        | 2.3                       | 1,120      | 0.3%                        | 1.4                       |
| Hypertension                             | 14                                | 0.4%                        | 2.5                       | 25         | 0.5%                        | 2.7                       | 642             | 0.9%                        | 7.0                       | 1,199      | 0.3%                        | 1.5                       |
| All other chronic ACSC                   | 12                                | 0.3%                        | 2.2                       | 15         | 0.3%                        | 1.6                       | 403             | 0.6%                        | 4.4                       | 532        | 0.2%                        | 0.7                       |
| Persons presenting for Vaccine ACSC      | 42                                | 1.1%                        | 7.5                       | 34         | 0.7%                        | 3.6                       | 238             | 0.4%                        | 2.6                       | 2,662      | 0.8%                        | 3.3                       |
| Persons presenting for GP-Type           | 2,362                             | 63.0%                       | 423.7                     | 2,896      | 56.8%                       | 308.0                     | 15,154          | 22.4%                       | 166.2                     | 193,249    | 55.7%                       | 240.1                     |

Note: As a person may present more than one time for more than one category or condition, the sum of persons at category and condition levels may not equal the total number of persons having presented.

**Supplemental Online Table E Worked example of excess ED costs per head of population, South Australian public hospitals 2005-06 to 2010-11**

**a. Excerpt from Table 3**

|                                   | Mean total cost per presenter | Cost differential (Observed vs Reference) | Presenters per 1,000 population | Rate differential (Observed vs Reference) | Cost of excess presenters per 1,000 population <sup>#</sup> | population ('000s) | potential annual "saving" |
|-----------------------------------|-------------------------------|-------------------------------------------|---------------------------------|-------------------------------------------|-------------------------------------------------------------|--------------------|---------------------------|
| <b>ACSC presentations*</b>        |                               |                                           |                                 |                                           |                                                             |                    |                           |
| Refugee & Asylum Seeker Countries | \$ 800                        | -\$ 916                                   | 131.7                           | 60.0                                      | \$ 22,524                                                   | 5.6                | \$ 20,929                 |
| Aboriginal                        | \$ 1,581                      | -\$ 135                                   | 154.6                           | 83.0                                      | \$ 161,670                                                  | 9.4                | \$ 253,359                |
| Aged 75 or more                   | \$ 1,651                      | -\$ 65                                    | 206.4                           | 134.8                                     | \$ 257,950                                                  | 91.2               | \$ 3,920,070              |
| All others                        | \$ 1,156                      | Reference                                 | 71.7                            | Reference                                 |                                                             |                    | <b>\$ 4,194,357</b>       |
| <b>GP-type presentations*</b>     |                               |                                           |                                 |                                           |                                                             |                    |                           |
| Refugee & Asylum Seeker Countries | \$ 631                        | -\$ 1,085                                 | 423.7                           | 183.6                                     | \$ 106,573                                                  | 5.6                | \$ 99,023                 |
| Aboriginal                        | \$ 897                        | -\$ 820                                   | 308.0                           | 67.9                                      | \$ 115,384                                                  | 9.4                | \$ 180,822                |
| Aged 75 or more                   | \$ 649                        | -\$ 1,067                                 | 166.2                           | -73.9                                     | -\$ 52,827                                                  | 91.2               |                           |
| All others                        | \$ 670                        | Reference                                 | 240.1                           | Reference                                 |                                                             |                    | <b>\$ 279,845</b>         |

\* cost is calculated at \$5,007 per Urgency Related Group (v1.4) price weight

<sup>#</sup> Excess cost per 1,000 population= Group presenter numbers at their average cost less presenter numbers in the comparison group at their average cost.

**b. Cell references and formulae**

|                                   | Mean total cost per presenter | Cost differential (Observed vs Reference) | Presenters per 1,000 population | Rate differential (Observed vs Reference) | Cost of excess presenters per 1,000 population <sup>#</sup> | population ('000s) | potential annual "saving" |
|-----------------------------------|-------------------------------|-------------------------------------------|---------------------------------|-------------------------------------------|-------------------------------------------------------------|--------------------|---------------------------|
| <b>ACSC presentations*</b>        |                               |                                           |                                 |                                           |                                                             |                    |                           |
| Refugee & Asylum Seeker Countries | A1                            | =A1-A4                                    | D1                              | =D1-D4                                    | F1=(A1*D1)-(A4*D4)                                          | H1                 | I1=F1*H1/6                |
| Aboriginal                        | A2                            | =A2-A4                                    | D2                              | =D2-D4                                    | F2=(A2*D2)-(A4*D4)                                          | H2                 | I2=F2*H2/6                |
| Aged 75 or more                   | A3                            | =A3-A4                                    | D3                              | =D3-D4                                    | F3=(A3*D3)-(A4*D4)                                          | H3                 | I3=F3*H3/6                |
| All others                        | A4                            | Reference                                 | D4                              | Reference                                 |                                                             |                    | <b>=sum(I1:I3)</b>        |
| <b>GP-type presentations*</b>     |                               |                                           |                                 |                                           |                                                             |                    |                           |
| Refugee & Asylum Seeker Countries | A5                            | =A5-A8                                    | D5                              | =D5-D8                                    | F5=(A5*D5)-(A8*D8)                                          | H5                 | I5=F5*H5/6                |
| Aboriginal                        | A6                            | =A6-A8                                    | D6                              | =D6-D8                                    | F6=(A6*D6)-(A8*D8)                                          | H6                 | I6=F6*H6/6                |
| Aged 75 or more                   | A7                            | =A7-A8                                    | D7                              | =D7-D8                                    | F7=(A7*D7)-(A8*D8)                                          | H7                 |                           |
| All others                        | A8                            | Reference                                 | D8                              | Reference                                 |                                                             |                    | <b>=sum(I5:I6)</b>        |
